# Supplementary material for: Integrating predicted transcriptome from multiple tissues improves association detection
Source: PubMed Central journal article supplement (PMC6358100; doi:10.1371/journal.pgen.1007889), 2019-01-22
Supplement: pgen.1007889.s019.pdf [file pgen.1007889.s019.pdf]

Supplementary Table 1: Summary statistics comparing S-MultiXcan and S-PrediXcan on public GWAS

|                                                                |      |
|----------------------------------------------------------------|------|
| Traits with more S-MultiXcan-significant associations          | 51   |
| Traits with more S-PrediXcan-significant associations          | 20   |
| Tied traits                                                    | 12   |
| Traits without significant associations                        | 26   |
| Average increase in significant associations for S-MultiXcan * | 10.8 |
| Average significant association overlap **                     | 53 % |

\*: average performed across traits where there is at least one S-PrediXcan- or S-MultiXcan-significant association.

\*\* : computed as  $\frac{\#shared}{\#union(SM,SP)}$ , with  $SM$  the S-MultiXcan-significant associations,  $SP$  the S-PrediXcan-significant associations, and  $\#shared$  the number of shared associations.
